# Supplementary material
Source: PubMed Central journal article supplement (PMC4932859)
Supplement: NIHMS778769-supplement-Sup__1.pdf [file NIHMS778769-supplement-Sup__1.pdf]

**Data Supplement 1:** Assist scores by substance category for participants reporting any lifetime use

| Specific substances        | <u>Males</u> |            | <u>Females</u> |            | Difference<br>(95% CI) |
|----------------------------|--------------|------------|----------------|------------|------------------------|
|                            | n            | Mean (SE)  | n              | Mean (SE)  |                        |
| Tobacco (smoking)          | 2,033        | 13.7 (0.2) | 2,228          | 12.9 (0.2) | 0.8 (0.1 to 1.4)       |
| Alcohol                    | 2,544        | 7.9 (0.2)  | 3,043          | 5.2 (0.1)  | 2.7 (2.3 to 3.2)       |
| All drugs                  | 2,049        | 16.0 (0.7) | 2,097          | 12.2 (0.5) | 4.8 (3 to 6.5)         |
| Marijuana                  | 1,951        | 6.8 (0.2)  | 1,919          | 5.0 (0.2)  | 1.8 (-1.2 to 2.4)      |
| Cocaine or crack           | 894          | 5.6 (0.3)  | 681            | 5.3 (0.4)  | 0.3 (-0.7 to 1.3)      |
| Prescription opioids       | 527          | 8.6 (0.5)  | 430            | 8.6 (0.5)  | -0.1 (-1.5 to 1.3)     |
| Hallucinogens              | 641          | 1.6 (0.2)  | 389            | 1.1 (0.2)  | 0.4 (-0.1 to 1)        |
| Benzodiazepines            | 324          | 6.7 (0.6)  | 302            | 7.5 (0.6)  | -0.9 (-2.5 to 0.8)     |
| Methamphetamines           | 349          | 2.9 (0.4)  | 287            | 2.2 (0.3)  | 0.7 (-0.2 to 1.6)      |
| Heroin                     | 336          | 7.9 (0.6)  | 204            | 7.5 (0.8)  | 0.7 (-1.6 to 2.5)      |
| Amphetamines               | 213          | 3.9 (0.5)  | 184            | 4.1 (0.5)  | -0.1 (-1.6 to 1.3)     |
| Inhalants                  | 222          | 2.3 (0.4)  | 134            | 1.3 (0.3)  | 1 (-0.2 to 2.2)        |
| Methadone or buprenorphine | 127          | 10.0 (1.1) | 76             | 8.0 (1.3)  | 2 (-1.3 to 5.3)        |
| Gamma-hydroxybutyrate      | 68           | 3.3 (1.0)  | 35             | 0.8 (0.3)  | 2.5 (-0.5 to 5.4)      |
| Barbiturates               | 55           | 4.4 (1.2)  | 38             | 4.1 (1.3)  | 0.3 (-3.2 to 3.8)      |
| Total ASSIST score         | 2,666        | 30.3 (0.8) | 3,232          | 21.1 (0.5) | 9.2 (7.4 to 10.9)      |

ASSIST = Alcohol, Smoking and Substance Involvement Screening Test.

CI = confidence interval. SE = standard error.
