# Supplementary material
Source: PubMed Central journal article supplement (PMC4932859)
Supplement: NIHMS778769-supplement-Sup__2.pdf [file NIHMS778769-supplement-Sup__2.pdf]

**Data Supplement 2. WHO recommendations for interventions by substance to men versus women**

| Specific Substances                                         | Lifetime use (not in the past 3 months) |                 |                              | Past 3-month use   |              |                              |                        |             |                              |
|-------------------------------------------------------------|-----------------------------------------|-----------------|------------------------------|--------------------|--------------|------------------------------|------------------------|-------------|------------------------------|
|                                                             | Brief intervention                      |                 |                              | Brief Intervention |              |                              | Intensive Intervention |             |                              |
|                                                             | Male<br>n (%)                           | Female<br>n (%) | Mean Difference<br>(95 % CI) | Male<br>n          | Female<br>n  | Mean Difference<br>(95 % CI) | Male<br>%              | Female<br>% | Mean Difference<br>(95 % CI) |
| Smoking                                                     | 641 (12.0)                              | 808 (9.2)       | 2.85 (0.3 to 6.0)            | 1,392 (75.0)       | 1,420 (73.6) | 1.4 (-1.8 to 4.6)            | 20.0                   | 21.6        | -1.6 (-4.6 to 1.4)           |
| Alcoholic beverages                                         | 662 (0.0)                               | 966 (0.0)       | 0.0 (0.0 to 0.0)             | 1,882 (23.6)       | 2,077 (14.4) | 9.1 (6.7 to 11.6)            | 9.9                    | 5.4         | 4.5 (2.9 to 6.2)             |
| <b>Drugs</b>                                                |                                         |                 |                              |                    |              |                              |                        |             |                              |
| Marijuana                                                   | 1,010 (3.6)                             | 1,152 (3.4)     | 0.1 (-1.4 to 1.7)            | 941 (71.6)         | 767 (66.0)   | 5.7 (1.3 to 10.1)            | 12.0                   | 11.1        | 0.9 (-2.1 to 4.0)            |
| Cocaine or crack                                            | 675 (12.6)                              | 528 (11.6)      | 1.0 (-2.7 to 4.8)            | 219 (49.8)         | 153 (49.7)   | 0.1 (-10.3 to 10.5)          | 32.4                   | 34.0        | -1.6 (-11.3 to 8.2)          |
| Prescription opioids                                        | 304 (18.8)                              | 246 (13.4)      | 5.3 (-0.9 to 11.5)           | 223 (53.4)         | 184 (60.3)   | -7.0 (-16.6 to 2.7)          | 29.6                   | 28.3        | 1.3 (-7.5 to 10.2)           |
| Hallucinogens                                               | 588 (4.1)                               | 362 (3.0)       | 1.0 (-1.4 to 3.5)            | 53 (41.5)          | 27 (63.0)    | -21.5 (-44.4 to 1.5)         | 18.9                   | 3.7         | 15.2 (-0.6 to 31.0)          |
| Benzodiazepines                                             | 217 (10.1)                              | 177 (10.7)      | -0.6 (-6.7 to 5.5)           | 107 (47.7)         | 125 (57.6)   | -9.9 (-22.8 to 2.9)          | 31.8                   | 24.8        | 7.0 (-4.6 to 18.6)           |
| Methamphetamines                                            | 288 (4.9)                               | 247 (6.5)       | -1.6 (-5.5 to 2.3)           | 61 (50.8)          | 40 (65.0)    | -14.2 (-34.0 to 56.0)        | 13.4                   | 7.5         | 8.9 (-4.5 to 22.3)           |
| Opioids                                                     | 241 (21.2)                              | 149 (20.1)      | 1.0 (-7.2 to 9.3)            | 95 (44.2)          | 55 (40.0)    | 4.2 (-12.3 to 20.7)          | 47.4                   | 49.1        | -1.7 (-18.4 to 15.0)         |
| Amphetamines                                                | 161 (6.2)                               | 127 (4.7)       | 1.5 (-3.9 to 6.8)            | 52 (51.9)          | 57 (61.4)    | -9.5 (-28.2 to 9.2)          | 19.2                   | 12.3        | 7.0 (-6.8 to 20.7)           |
| Inhalants                                                   | 192 (1.0)                               | 123 (2.4)       | -1.4 (-4.2 to 1.4)           | 30 (43.3)          | 11 (54.6)    | -11.2 (-46.4 to 23.9)        | 23.3                   | 9.1         | 14.2 (-13.5 to 42.0)         |
| Methadone or buprenorphine                                  | 72 (22.2)                               | 49 (16.3)       | 5.9 (-8.7 to 20.5)           | 55 (58.2)          | 27 (51.9)    | 6.3 (-16.8 to 29.4)          | 34.6                   | 37.0        | -2.5 (-24.8 to 19.8)         |
| Gamma-hydroxybutyrate                                       | 60 (5.0)                                | 33 (9.1)        | -4.1 (-14.6 to 6.4)          | 8 (25.0)           | 2 (50.0)     | -25.0 (- 98.5 to 48.5)       | 50.0                   | 0.0         | 50.0 (27.5 to 72.5)          |
| Barbiturates                                                | 48 (14.6)                               | 32 (18.8)       | -4.2 (-20.9 to 12.5)         | 10 (40.0)          | 6 (50.0)     | -10.0 (-63.4 to 43.4)        | 40.0                   | 16.7        | 24.0 (-25.3 to 72.0)         |
| Mean difference: males - females. CI = confidence interval. |                                         |                 |                              |                    |              |                              |                        |             |                              |
