# Supplementary material
Source: PubMed Central journal article supplement (PMC4932859)
Supplement: NIHMS778769-supplement-Sup__3.pdf [file NIHMS778769-supplement-Sup__3.pdf]

**Data Supplement 3:** Odds of needing an intervention for women compared to men by level of intervention.

| Substance            |             | Any Intervention<br>OR (95% CI) | Brief Intervention<br>OR (95% CI) | Intensive Intervention<br>OR (95% CI) |
|----------------------|-------------|---------------------------------|-----------------------------------|---------------------------------------|
| Tobacco              | Unadjusted* | 0.8 (0.7-0.9)                   | 0.8 (0.7-0.9)                     | 0.9 (0.7-1.1)                         |
|                      | Adjusted†   | 0.9 (0.6-1.3)                   | 0.9 (0.6-1.2)                     | 1.0 (0.6-1.8)                         |
| Alcohol              | Unadjusted  | 0.5 (0.4-0.5)                   | 0.5 (0.4-0.6)                     | 0.4 (0.3-0.6)                         |
|                      | Adjusted    | 0.6 (0.4-0.8)                   | 0.6 (0.4-0.8)                     | 0.5 (0.2-0.9)                         |
| Marijuana            | Unadjusted  | 0.7 (0.6-0.8)                   | 0.7 (0.6-0.8)                     | 0.7 (0.5-0.9)                         |
|                      | Adjusted    | 0.8 (0.6-1.1)                   | 0.8 (0.6-1.2)                     | 0.6 (0.3-1.2)                         |
| Prescription opioids | Unadjusted  | 0.9 (0.6-1.3)                   | 0.9 (0.6-1.3)                     | 1.0 (0.6-1.6)                         |
|                      | Adjusted    | 0.8 (0.2-2.8)                   | 0.7 (0.1-3.7)                     | 1.1 (0.2-5.4)                         |
| Other drugs          | Unadjusted  | 0.9 (0.8-1.1)                   | 0.9 (0.8-1.1)                     | 0.9 (0.7-1.2)                         |
|                      | Adjusted    | 1.1 (0.7-1.7)                   | 1.1 (0.7-1.8)                     | 0.7 (0.3-1.6)                         |

Male and “No intervention” are the reference groups. OR = Odds Ratio; CI = confidence interval.

\*Unadjusted logistic model.

†Multivariable logistic model adjusted for age, gender, race, education, insurance status, partner status, homelessness, employment status, presence minor child in the home, (presence minor child in the home) x sex, and age x sex.
